# Supplementary material for: Motion-in-depth perception and prey capture in the praying mantis Sphodromantis lineola
Source: Oxford University Press journal article supplement (doi:10.1242/jeb.198614), 2019-01-01
Supplement: jeb198614supp.pdf [file jeb198614supp.pdf]

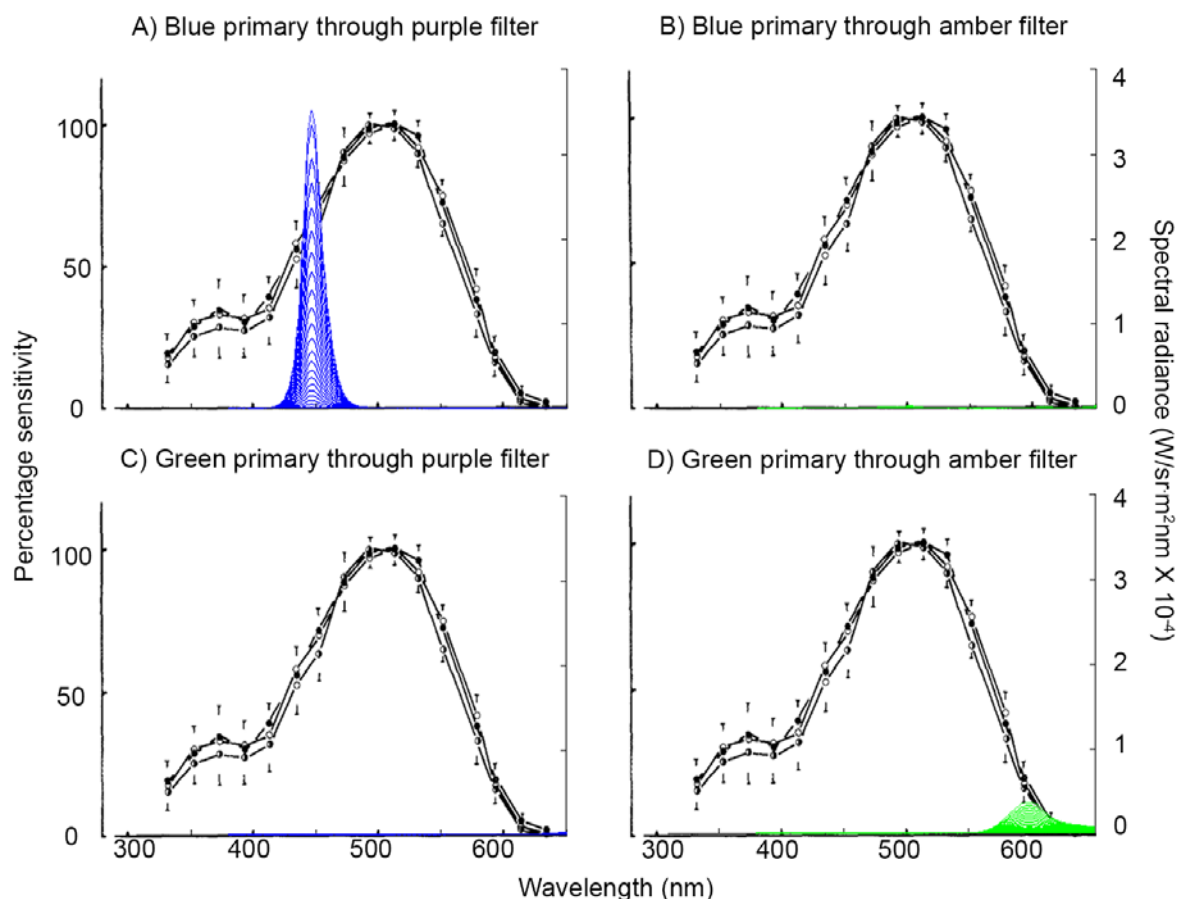

**Fig. S1:** Spectral transmittance measurements for the anaglyph 3D glasses. Spectral radiance of light across different wavelengths as transmitted through the filters (y-axis on the right) compared to the mantis spectral sensitivity curve reproduced from Rossel (1979) (y-axis on the left). Different individual curves show spectral radiance measured at increasing digital driving levels. Filters used were LEE filters: Filter 797 Purple and Filter 135 Deep Golden Amber. A) Light from the blue primary transmitted through the purple filter. B) Light from the blue primary transmitted through the amber filter. C) Light from the green primary transmitted through the purple filter. D) Light from the green primary transmitted through the amber filter.

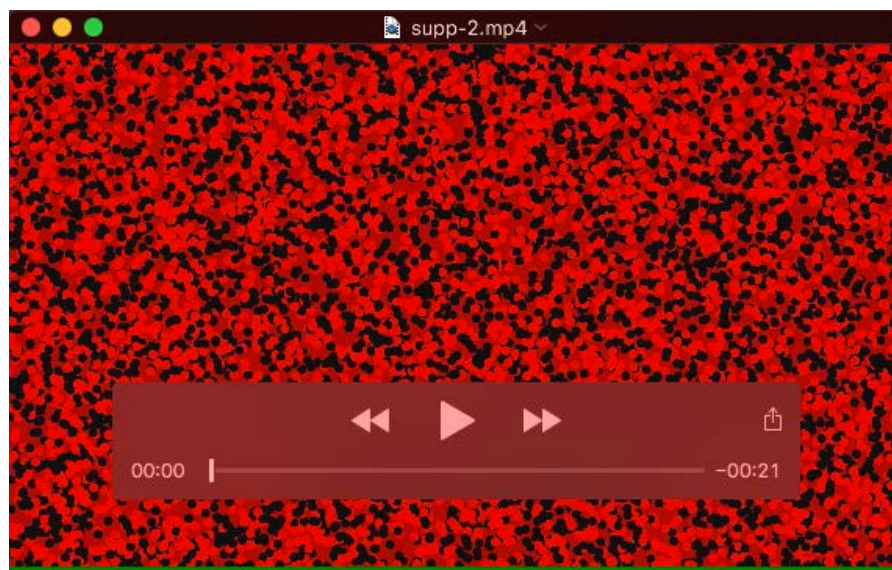

**Movie 1:** Single channel video of the stimulus used in Experiment 1. The condition here is the Motion-in-Depth condition. The original stimulus was a two channel green-blue stimulus as detailed in the methods section.

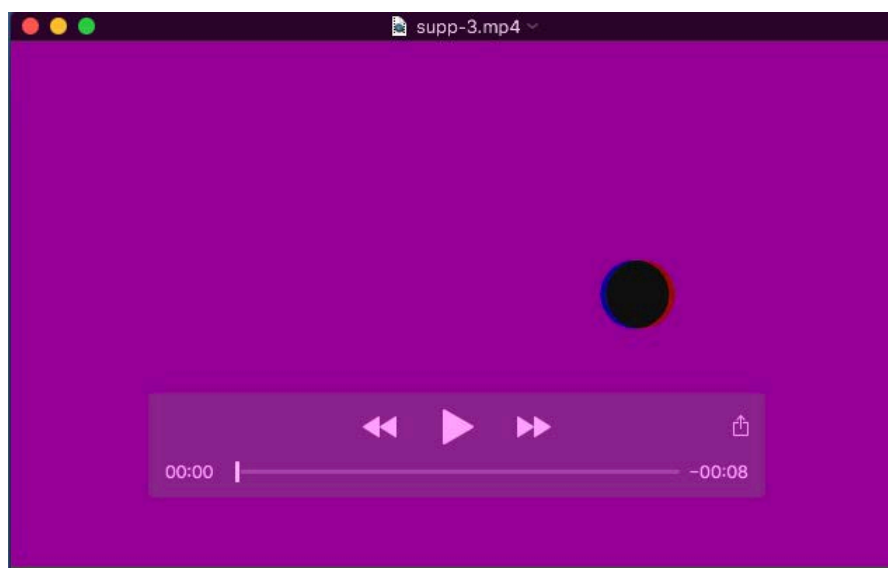

**Movie 2:** Red-blue video of the stimulus used in Experiment 2. The condition depicted here is condition 1 with both looming and changing disparity. The original stimulus was a two channel green-blue stimulus as detailed in the methods section.

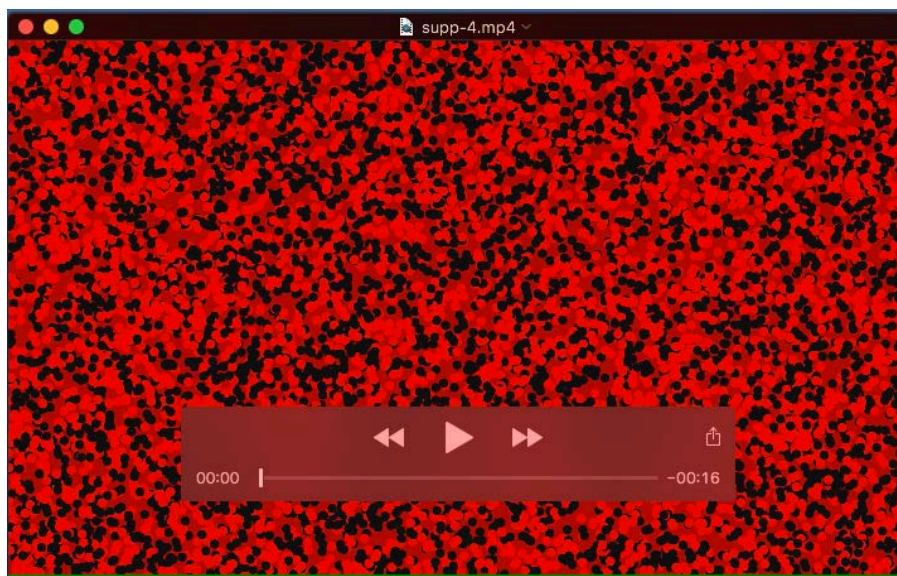

**Movie 3:** Single channel video of the stimulus used in Experiment 3. The condition here is the looming condition with internal dot motion. The original stimulus was a two channel green-blue stimulus as detailed in the methods section.
